# Supplementary material for: Cu2+and AMP complexation of enlarged tripodal polyamines
Source: Royal Society of Chemistry journal article supplement (doi:10.1039/b605639c), 2006-01-01
Supplement: b605639c.pdf [file b605639c.pdf]

## $\text{Cu}^{2+}$ and AMP Complexation of Enlarged Tripodal Polyamines

M. Teresa Albelda, Enrique García-España, Hermas R. Jiménez, José M. Llinares,  
Conxa Soriano, Alejandra Sornosa-Ten, Begoña Verdejo.

<sup>a</sup> *Departament de Química Inorgànica, Institut de Ciència Molecular (ICMOL), Facultat de Química, Universitat de València, 46100 Burjassot, Valencia, Spain. Fax: 96 3864322; Tel: 963864879; E-mail: [enrique.garcia-es@uv.es](mailto:enrique.garcia-es@uv.es)*

<sup>b</sup> *Departament de Química Orgànica, Institut de Ciència Molecular (ICMOL), Facultat de Farmàcia, Universitat de València, 46100 Burjassot, Valencia, Spain.*

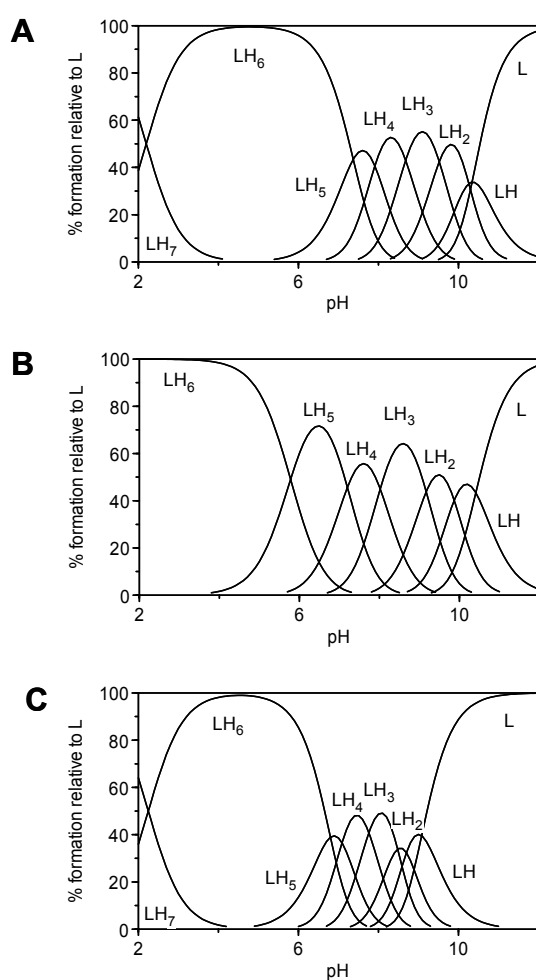

**Fig. S1.** Distributions diagrams for the systems (A)  $\text{H}^+$ -TAL; (B)  $\text{H}^+$ -ATAL; (C)  $\text{H}^+$ -N3TAL.

**Table S1** Observed chemical shifts for the interaction of AMP with the tripodals ligands **TAL**, **ATAL**

| [AMP]/[L] | TAL  | ATAL |
|-----------|------|------|
| 0,5       | 3,14 | 3,72 |
| 0.75      | 3,11 | 3,73 |
| 1         | 2,41 | 3,66 |
| 1.25      | 2,41 |      |
| 1.5       | 2,29 | 3,33 |
| 1.75      | 2,22 | 3,24 |
| 2         | 2,11 | 3,12 |
| 2.25      | 1,91 |      |
| 2.5       | 1,92 | 3,02 |
| 2.75      | 1,85 | 3    |
| 3         | 1,77 | 2,77 |
| 3,5       | 1,67 |      |
| 4         | 2,3  |      |
| 4,5       | 2,17 | 2,67 |
| 5         | 2,13 |      |

**Table S2** Logarithms of the equilibrium constants for the interaction of AMP (AMP  $\equiv$  A) with the tripodal polyamines **TAL**, **ATAL** and **N3TAL** determined at 298.0  $\pm$  0.1 K in 0.15 mol·dm<sup>-3</sup> NaCl.

| Reaction                                                     | TAL      | ATAL     | N3TAL               |
|--------------------------------------------------------------|----------|----------|---------------------|
| A + L $\rightleftharpoons$ AL <sup>a</sup>                   | 4.76(5)  | 6.41(6)  | 5.3(1) <sup>b</sup> |
| A + H + L $\rightleftharpoons$ HAL                           | 15.51(5) | 16.81(7) | 15.36(9)            |
| A + 2H + L $\rightleftharpoons$ H <sub>2</sub> AL            | 25.62(5) | 26.84(6) | 23.8(1)             |
| A + 3H + L $\rightleftharpoons$ H <sub>3</sub> AL            | 35.34(5) | 36.08(6) | 32.56(8)            |
| A + 4H + L $\rightleftharpoons$ H <sub>4</sub> AL            | 44.07(5) | 44.27(6) | 40.17(9)            |
| A + 5H + L $\rightleftharpoons$ H <sub>5</sub> AL            | 52.09(5) | 51.82(7) | 47.53(8)            |
| A + 6H + L $\rightleftharpoons$ H <sub>6</sub> AL            | 59.44(4) | 58.10(4) | 54.14(8)            |
| A + 7H + L $\rightleftharpoons$ H <sub>7</sub> AL            | 64.2(1)  |          | 59.15(8)            |
| 2A+5H+L $\rightleftharpoons$ H <sub>5</sub> A <sub>2</sub> L | 54.8(1)  |          |                     |
| 2A+6H+L $\rightleftharpoons$ H <sub>6</sub> A <sub>2</sub> L | 62.33(9) |          |                     |
| 2A+7H+L $\rightleftharpoons$ H <sub>7</sub> A <sub>2</sub> L | 68.80(8) |          |                     |
| 2A+8H+L $\rightleftharpoons$ H <sub>8</sub> A <sub>2</sub> L | 74.14(5) | 71.1(1)  |                     |
| 3A+5H+L $\rightleftharpoons$ H <sub>5</sub> A <sub>3</sub> L | 58.54(5) |          |                     |
| 3A+6H+L $\rightleftharpoons$ H <sub>6</sub> A <sub>3</sub> L | 66.17(5) | 64.97(8) |                     |
| 3A+7H+L $\rightleftharpoons$ H <sub>7</sub> A <sub>3</sub> L | 72.71(5) |          |                     |
| 3A+8H+L $\rightleftharpoons$ H <sub>8</sub> A <sub>3</sub> L | 78.79(5) |          |                     |
| 3A+9H+L $\rightleftharpoons$ H <sub>9</sub> A <sub>3</sub> L | 83.91(4) |          |                     |

<sup>a</sup> Charges omitted for clarity. <sup>b</sup>Numbers in parentheses are standard deviations in the last significant figure

**Table S3.** <sup>1</sup>H NMR hyperfine-shifted resonances and temperature dependence of Cu<sub>2</sub>TAL, Cu<sub>2</sub>TAL - AMP complexes in D<sub>2</sub>O at 25 °C and pH 8.

| Complex                 | Signal | δ(ppm) | N° of protons | Assign.                              | Temperature dependence | T <sub>1</sub> (ms) | Δν <sub>1/2</sub> (Hz) | T <sub>2</sub> (ms) <sup>a</sup> |
|-------------------------|--------|--------|---------------|--------------------------------------|------------------------|---------------------|------------------------|----------------------------------|
| Cu <sub>2</sub> TAL     | a      | 3.6    | 6             | βCH <sub>2</sub>                     | Anti-Curie             | 3.7                 | 150                    | 2.1                              |
|                         | b      | 2.4    |               |                                      | Anti-Curie             | <1                  | b                      | b                                |
|                         | B      | 1.2    | 24            | αCH <sub>2</sub>                     | Anti-Curie             | b                   | b                      | b                                |
|                         | c      | 0.28   |               |                                      | Anti-Curie             | <1                  | 341                    | 0.93                             |
|                         | d      | -9.3   |               |                                      | Curie                  | <1                  | 1624                   | 0.20                             |
| Cu <sub>2</sub> TAL-AMP | a'     | 3.6    | 6             | βCH <sub>2</sub>                     | Anti-Curie             | 2.5                 | 195                    | 1.6                              |
|                         | b'     | 2.5    |               |                                      | Anti-Curie             | <1                  | b                      | b                                |
|                         | c'     | 0.27   | 24            | αCH <sub>2</sub>                     | Anti-Curie             | <1                  | 361                    | 0.88                             |
|                         | d'     | -9.2   |               |                                      | Curie                  | <1                  | 1131                   | 0.28                             |
|                         | e'     | 8.7    | 2x2           | γCH <sub>2</sub> -AMP                | Anti-Curie             | 11.2                | 78                     | 4.1                              |
|                         | g'     | 6.1    | 2x2           | H <sub>2,g</sub> CH-AMP <sup>c</sup> | Anti-Curie             | 48.7                | 18                     | 17.7                             |
|                         | f'     | 8.2    |               |                                      | Anti-Curie             | 45.4                | 30                     | 10.6                             |
|                         | h'     | 4.4    | 4x2           | δ-σCH-AMP <sup>c</sup>               | Anti-Curie             | 36.8                | b                      | b                                |
|                         | i'     | 4.3    |               |                                      | Anti-Curie             | 35.3                | b                      | b                                |
|                         | j'     | 3.9    |               |                                      | Anti-Curie             | 21.9                | 24                     | 13.3                             |

<sup>a</sup>Measured from the line width at half-height. <sup>b</sup> Overlap prevents measurement of this value. <sup>c</sup>Tentative assignments.

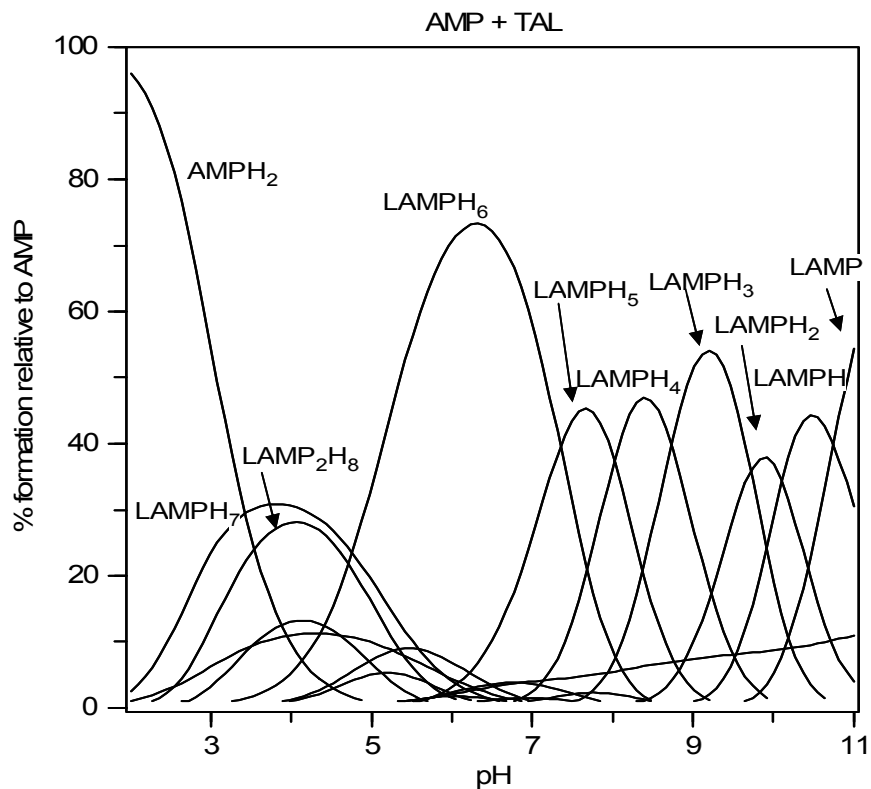

**Fig. S2** Distribution Diagrams for the system TAL-AMP. [TAL] =  $1 \cdot 10^{-3}$  mol·dm<sup>-3</sup>, [AMP] =  $1 \cdot 10^{-3}$  mol·dm<sup>-3</sup>.

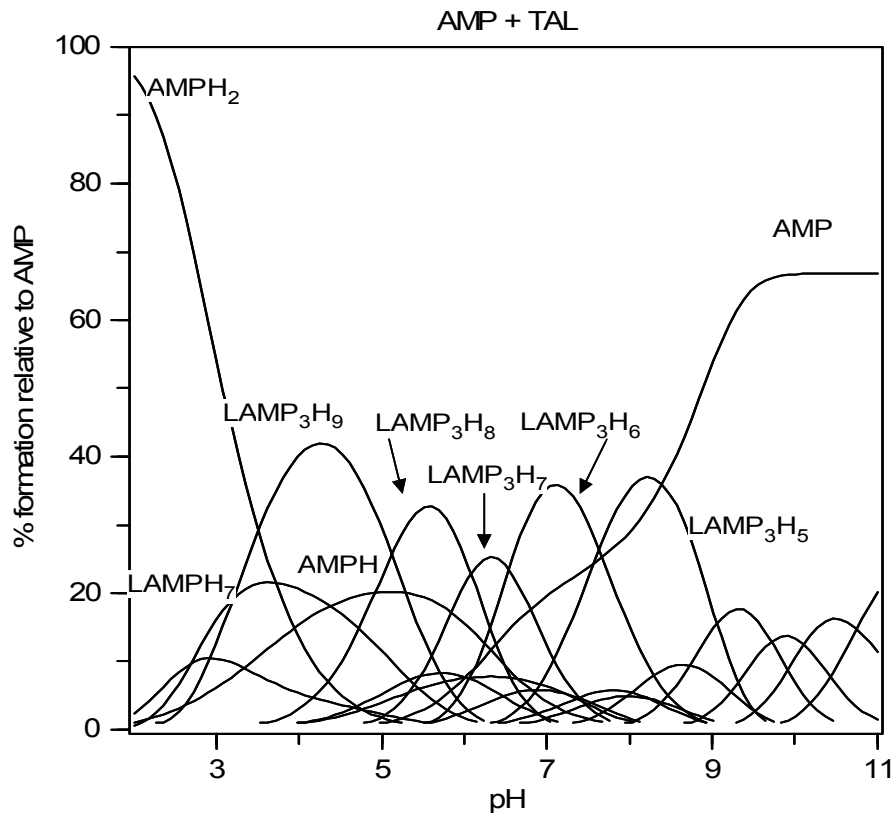

**Fig. S3** Distribution Diagrams for the system TAL-AMP. [TAL] =  $1 \cdot 10^{-3}$  mol·dm<sup>-3</sup>, [AMP] =  $3 \cdot 10^{-3}$  mol·dm<sup>-3</sup>.

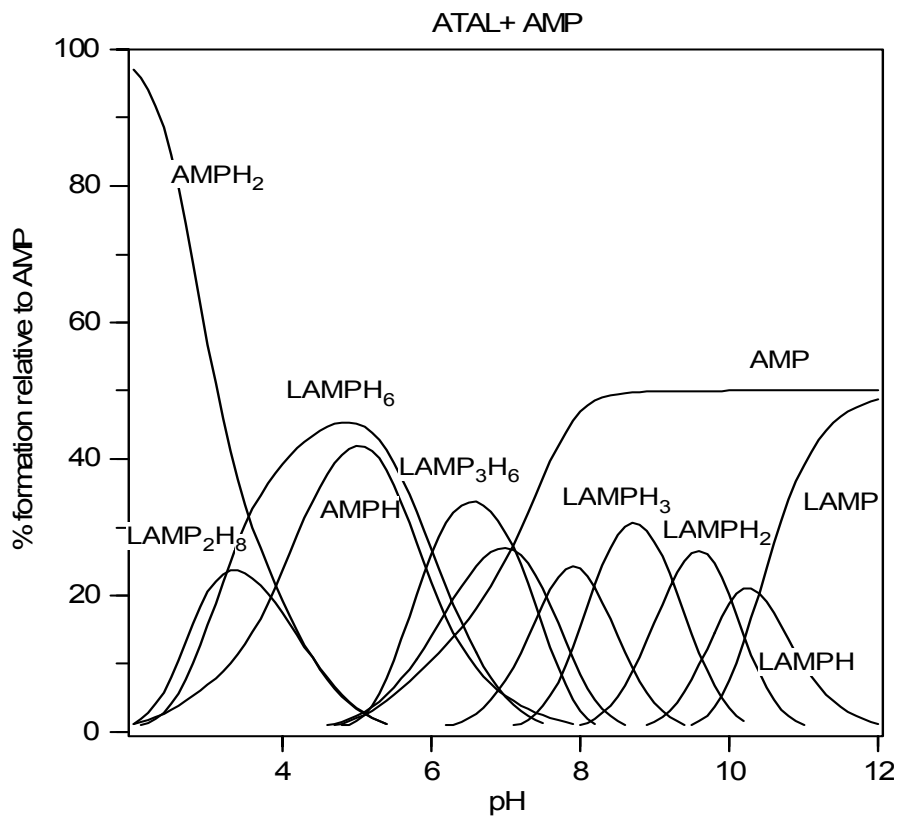

**Fig. S4** Distribution Diagrams for the system ATAL-AMP.  $[ATAL] = 1 \cdot 10^{-3} \text{ mol} \cdot \text{dm}^{-3}$ ,  $[AMP] = 2 \cdot 10^{-3} \text{ mol} \cdot \text{dm}^{-3}$ .

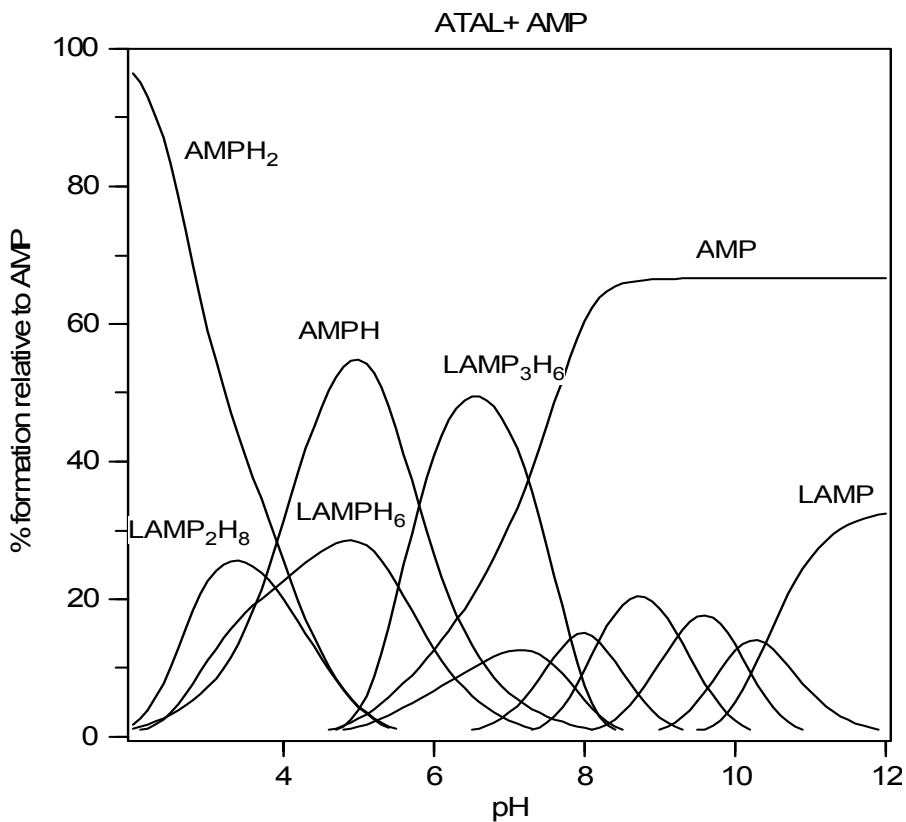

**Fig. S5** Distribution Diagrams for the system ATAL-AMP.  $[ATAL] = 1 \cdot 10^{-3} \text{ mol} \cdot \text{dm}^{-3}$ ,  $[AMP] = 3 \cdot 10^{-3} \text{ mol} \cdot \text{dm}^{-3}$ .

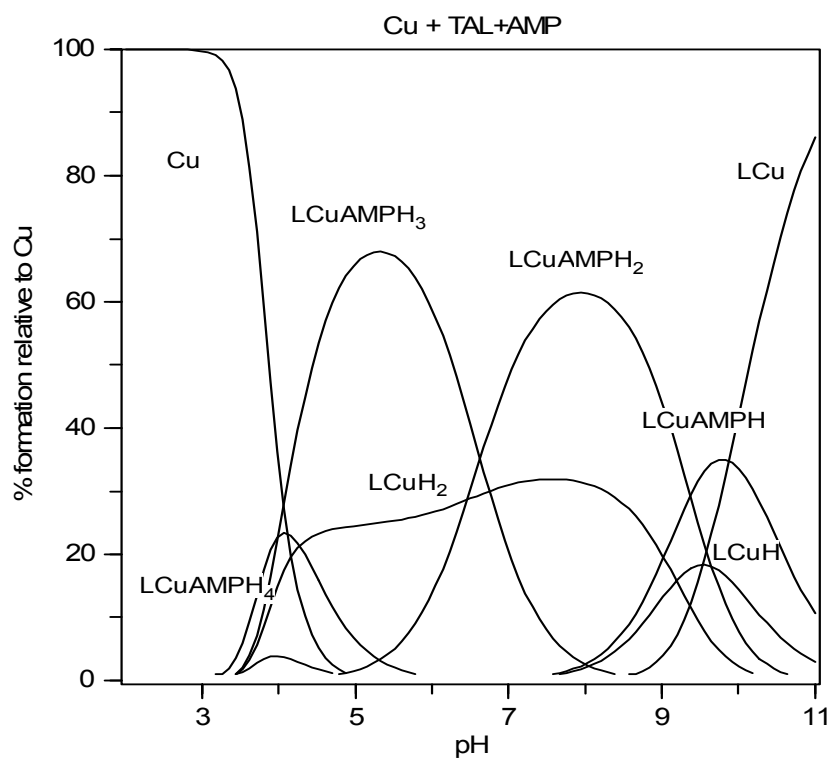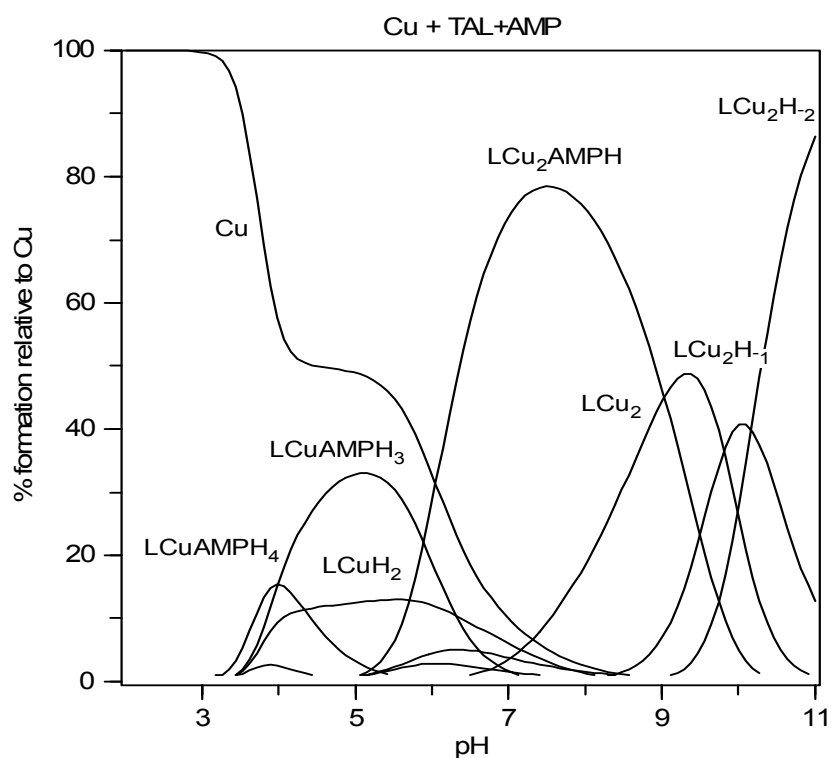

**Fig. S6** Distribution Diagrams for the ternary system  $\text{Cu}^{2+}$ -TAL-AMP. (A)  $[\text{Cu}^{2+}] = [\text{TAL}] = [\text{AMP}] = 1 \cdot 10^{-3} \text{ mol} \cdot \text{dm}^{-3}$ . (B)  $[\text{Cu}^{2+}] = 2 \cdot 10^{-3} \text{ mol} \cdot \text{dm}^{-3}$ ,  $[\text{TAL}] = [\text{AMP}] = 1 \cdot 10^{-3} \text{ mol} \cdot \text{dm}^{-3}$

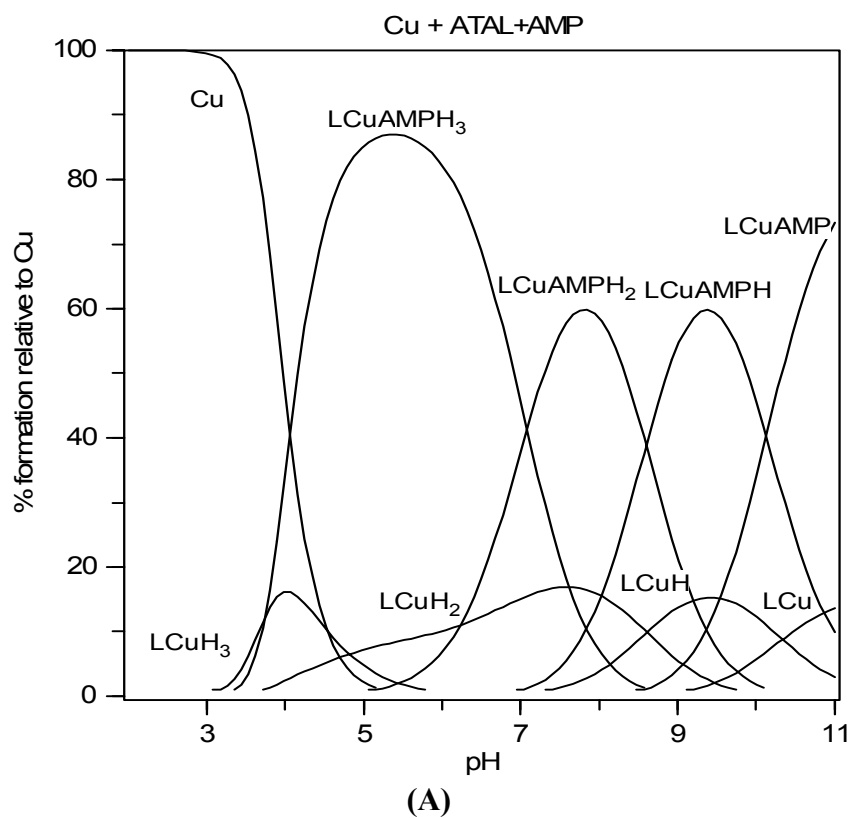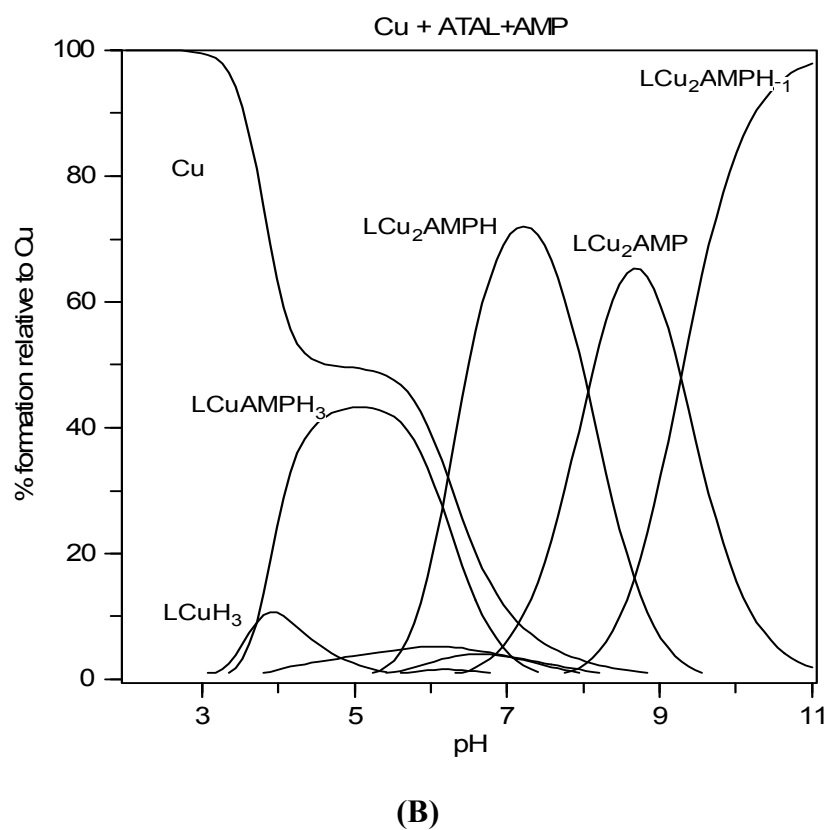

**Fig. S7** Distribution Diagrams for the ternary system  $\text{Cu}^{2+}$ -ATAL-AMP. (A)  $[\text{Cu}^{2+}] = [\text{ATAL}] = [\text{AMP}] = 1 \cdot 10^{-3} \text{ mol} \cdot \text{dm}^{-3}$ . (B)  $[\text{Cu}^{2+}] = 2 \cdot 10^{-3} \text{ mol} \cdot \text{dm}^{-3}$ ,  $[\text{ATAL}] = [\text{AMP}] = 1 \cdot 10^{-3} \text{ mol} \cdot \text{dm}^{-3}$ .



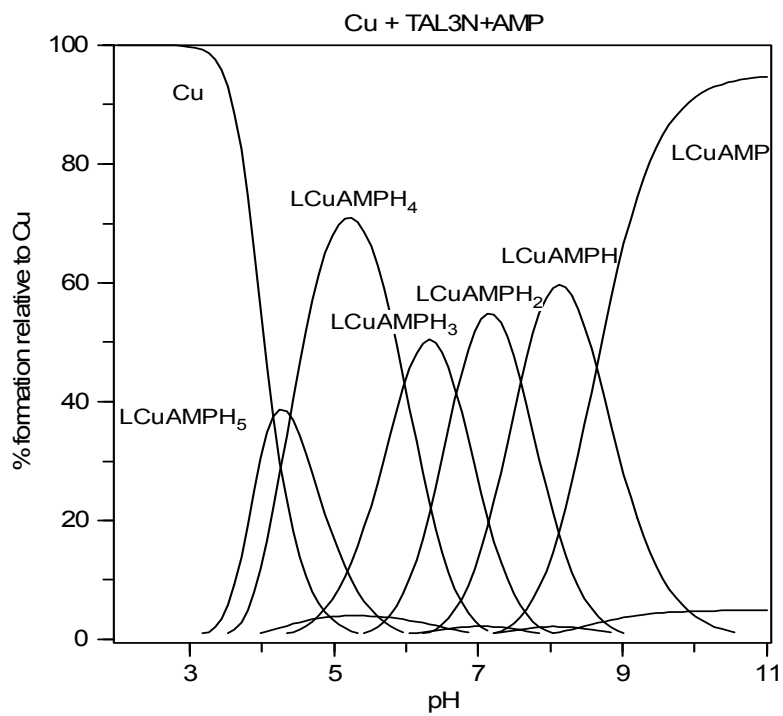

**Fig. S8** Distribution Diagrams for the ternary system  $\text{Cu}^{2+}$ -**N3TAL**-AMP.  $[\text{Cu}^{2+}] = [\text{N3TAL}] = [\text{AMP}] = 1 \cdot 10^{-3} \text{ mol} \cdot \text{dm}^{-3}$ .
